# Supplementary material for: Primary effusion lymphoma enhancer connectome links super-enhancers to dependency factors
Source: PubMed Central journal article supplement (PMC7726151; doi:10.1038/s41467-020-20136-w), 2020-12-09
Supplement: 41467_2020_20136_MOESM2_ESM.pdf [file 41467_2020_20136_MOESM2_ESM.pdf]

## **Description of Additional Supplementary Files**

**Supplementary Data 1:** SEs were linked to their target genes by H3K27ac HiChIP for each of the PEL cell line. The linked genes for each cell line are listed in the dataset.

**Supplementary Data 2:** Primers used in the paper.
